# THE AMERICAN JOURNAL OF PSYCHIATRY

## En este número

A18

### Perspectivas

#### Editoriales

- 1223** **Diseción del espacio endofenotípico con el estudio B-SNIP**  
Sophia Frangou
- 1226** **Sobre patrones alterados de activación cerebral en adolescentes y adultos jóvenes en riesgo**  
Robert S. Kern, William P. Horan, y Deanna M. Barch
- 1232** **Aumento de la respuesta al placebo en los ensayos de antipsicóticos: rompamos el círculo vicioso**  
Stefan Leucht, Stephan Heres, y John M. Davis
- 1235** **Uso de imágenes cerebrales para comprender la respuesta a la terapia cognitiva en el trastorno de pánico**  
Fritz Henn **Audio**

#### Comentario

- 1237** **Trastornos de la alimentación y de la conducta alimentaria en el DSM-5**  
Evelyn Attia, Anne E. Becker, Rachel Bryant-Waugh, Hans W. Hoek, Richard E. Kreipe, Marsha D. Marcus, James E. Mitchell, Ruth H. Striegel, B. Timothy Walsh, G. Terence Wilson, Barbara E. Wolfe, y Stephen Wonderlich **Audio**

#### Tratamiento en Psiquiatría

- 1240** **Dosificación de lamotrigina para pacientes en embarazo con trastorno bipolar**  
Crystal T. Clark, Autumn M. Klein, James M. Perel, Joseph Helsel, y Katherine L. Wisner **Audio**  
**Guías clínicas**

#### Imágenes en Psiquiatría

- 1248** **Transformación de un vertedero de basuras en una unidad psiquiátrica de hospitalización en Somalia**  
Jibril Handuleh

#### Resúmenes y Reseñas

- 1249** **El informe del equipo de trabajo (Task Force) de la Sociedad Internacional de Trastornos Bipolares (ISBD) sobre uso de antidepresivos en trastornos bipolares**  
Isabella Pacchiarotti, David J. Bond, Ross J. Baldessarini, Willem A. Nolen, Heinz Grunze, Rasmus W. Licht, Robert M. Post, Michael Berk, Guy M. Goodwin, Gary S. Sachs, Leonardo Tondo, Robert L. Findling, Eric A. Youngstrom, Mauricio Tohen, Juan Undurraga, Ana González-Pinto, Joseph

F. Goldberg, Ayşegül Yildiz, Lori L. Altshuler, Joseph R. Calabrese, Philip B. Mitchell, Michael E. Thase, Athanasios Koukopoulos, Francesc Colom, Mark A. Frye, Gin S. Malhi, Konstantinos N. Fountoulakis, Gustavo Vázquez, Roy H. Perlis, Terence A. Ketter, Frederick Cassidy, Hagop Akiskal, Jean-Michel Azorin, Marc Valentí, Diego Hidalgo Mazzei, Beny Lafer, Tadafumi Kato, Lorenzo Mazzarini, Anabel Martínez-Aran, Gordon Parker, Daniel Souery, Ayşegül Özerdem, Susan L. McElroy, Paolo Girardi, Michael Bauer, Lakshmi N. Yatham, Carlos A. Zarate, Andrew A. Nierenberg, Boris Birmaher, Shigenobu Kanba, Rif S. El-Mallakh, Alessandro Serretti, Zoltan Rihmer, Allan H. Young, Georgios D. Kotzalidis, Glenda M. MacQueen, Charles L. Bowden, S. Nassir Ghaemi, Carlos Lopez-Jaramillo, Janusz Rybakowski, Kyooseob Ha, Giulio Perugi, Siegfried Kasper, Jay D. Amsterdam, Robert M. Hirschfeld, Flávio Kapczinski, y Eduard Vieta **Audio** **Guías clínicas**

### Nuevas Investigaciones

#### Artículos

- 1263** **Fenotipos clínicos de la psicosis en el estudio B-SNIP (Red de trastorno bipolar y esquizofrenia sobre los fenotipos intermedios)**  
Carol A. Tamminga, Elena I. Ivleva, Matcheri S. Keshavan, Godfrey D. Pearlson, Brett A. Clementz, Bradley Witte, David W. Morris, Jeffrey Bishop, Gunvant K. Thaker, y John A. Sweeney **Audio**
- 1275** **Deterioro neuropsicológico en esquizofrenia y trastorno bipolar psicótico: hallazgos del estudio B-SNIP (Red de trastorno bipolar y esquizofrenia sobre los fenotipos intermedios)**  
S. Kristian Hill, James L. Reilly, Richard S.E. Keefe, James M. Gold, Jeffrey R. Bishop, Elliot S. Gershon, Carol A. Tamminga, Godfrey D. Pearlson, Matcheri S. Keshavan, y John A. Sweeney **Audio** **Editorial**
- 1285** **El volumen de materia gris como fenotipo intermedio para la psicosis: el estudio B-SNIP (Red de trastorno bipolar y esquizofrenia sobre los fenotipos intermedios)**  
Elena I. Ivleva, Anup S. Bidesi, Matcheri S. Keshavan, Godfrey D. Pearlson, Shashwath A. Meda, Darko Dodig, Amanda F. Moates, Hanzhang Lu, Alan N. Francis, Neeraj Tandon, David J. Schretlen, John A. Sweeney, Brett A. Clementz, y Carol A. Tamminga **Audio** **Editorial**
- 1297** **Memoria de trabajo preservada y activación cerebral alterada en personas con riesgo de psicosis**  
Siti N. Yaakub, Kavitha Dorairaj, Joann S. Poh, Christopher L. Asplund, Ranga Krishnan, Jimmy Lee, Richard S.E. Keefe, R. Alison Adcock, Stephen J. Wood, y Michael W.L. Chee **EMC** **Editorial**

**1308 Anomalías cerebrales anatómicas y funcionales en el primer episodio de esquizofrenia en pacientes que nunca han tomado medicación**

Wenting Ren, Su Lui, Wei Deng, Fei Li, Mingli Li, Xiaoqi Huang, Yuqing Wang, Tao Li, John A. Sweeney, y Qiyong Gong **EMC**

**1317 Integridad reducida de la sustancia blanca en parejas de hermanos discordantes para trastorno bipolar**

Emma Sprooten, Margaret S. Brumbaugh, Emma E.M. Knowles, D. Reese McKay, John Lewis, Jennifer Barrett, Stefanie Landau, Lindsay Cyr, Peter Kochunov, Anderson M. Winkler, Godfrey D. Pearlson, y David C. Glahn

**1326 Perturbación de las señales fronto-estriatales del aprendizaje por recompensa, inducida por metanfetaminas: Relación con los síntomas psicóticos**

Javier Bernacer, Philip R. Corlett, Pranathi Ramachandra, Brady McFarlane, Danielle C. Turner, Luke Clark, Trevor W. Robbins, Paul C. Fletcher, y Graham K. Murray

**1335 Análisis de meta-regresión de la respuesta al placebo en los ensayos con antipsicóticos, 1970–2010**

Ofer Agid, Cynthia O. Siu, Steven G. Potkin, Shitij Kapur, Eric Watsky, Douglas Vanderburg, Robert B. Zipursky, y Gary Remington **Editorial**

**1345 Sustratos neurales de la respuesta al tratamiento con terapia cognitivo-comportamental en el trastorno de pánico con agorafobia**

Ulrike Lueken, Benjamin Straube, Carsten Konrad, Hans-Ulrich Wittchen, Andreas Ströhle, André Wittmann, Bettina Pfeleiderer, Christina Uhlmann, Volker Arolt, Andreas Jansen, y Tilo Kircher **Audio Guías clínicas Editorial**

**1356 Menor rastreo neuronal del error de predicción en individuos dependientes de las sustancias**

Jody Tanabe, Jeremy Reynolds, Theodore Krmpotich, Eric Claus, Laetitia L. Thompson, Yiping P. Du, y Marie T. Banich **EMC**

Terapia psicodinámica o terapia cognitiva para el trastorno de ansiedad social

El volumen del gyrus rectus y la evaluación de la satisfacción con la solución de azúcar en los trastornos alimentarios

### Reseñas Bibliográficas

**1368** John W. Thompson: Psychiatrist in the Shadow of the Holocaust [John W. Thompson: Psiquiatra en la sombra del Holocausto]

Psychoanalytic Terms and Concepts [Términos y conceptos psicoanalíticos]

Management of Adults With Traumatic Brain Injury [Manejo de adultos con lesiones cerebrales traumáticas]

Casebook of Neuropsychiatry [Libro de casos de neuropsiquiatría]

### Otros Temas de Interés

**1375 Educación Médica Continuada**

**A5 Directivos de la American Psychiatric Association**

**A7 Calendario**

### Cubierta

Pie de la cubierta: Las plantas verdes y negras entrelazadas representan la manía y la depresión, el tema de este número. Ya se ha abandonado la consideración simplista del trastorno bipolar como una enfermedad benigna con altos y bajos. La depresión bipolar y la psicosis, ocasionalmente complicadas por el embarazo, son enfermedades importantes, que se investigan en varios artículos de este mes. Concepto de la cubierta por Wendy Taylor.

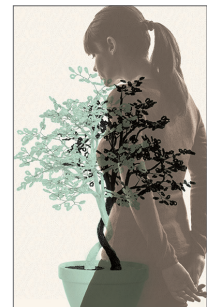

## Comunicados y Actualizaciones

### Cartas al Editor

**1364** Efectos a largo plazo de la exposición prenatal a inhibidores selectivos de la recaptación (ISR) de serotonina sobre el crecimiento infantil: sopesando la evidencia

**Audio** artículo en *AJP Audio*: archivo .mp3 descargable de [ajp.psychiatryonline.org](http://ajp.psychiatryonline.org)

**Guías clínicas** este artículo ofrece guías clínicas (ver página “En este Número” o al final del artículo)

**EMC** existe un curso en línea que cubre los contenidos de este artículo para los suscriptores del programa de cursos de EMC del AJP

**Editorial** este artículo se discute en uno de los editoriales de este número

La Tabla de Contenidos de Este Número Está Disponible en Español  
(This issue's Table of Contents is available in Spanish)

Presented in collaboration with the Office of Global Health, UMDNJ-Robert Wood Johnson Medical School

Translation courtesy of

Sergi Casals, M.A.

Garuna, Medellín, Colombia ([www.garunaeditors.com](http://www.garunaeditors.com))

Carlos Lopez Jaramillo, M.D.

Universidad de Antioquia, Medellín, Colombia

Javier I. Escobar, M.D., M.Sc.

UMDNJ-Robert Wood Johnson Medical School

Consulte *The American Journal of Psychiatry* en línea en [ajp.psychiatryonline.org](http://ajp.psychiatryonline.org)
